# Supplementary material for: Molecular modelling of polyimides with intrinsic microporosity: from structural characteristics to transport behaviour
Source: Royal Society of Chemistry journal article supplement (doi:10.1039/c3ra40196k), 2013-01-01
Supplement: c3ra40196k.pdf [file c3ra40196k.pdf]

# Molecular Modelling of Polyimides with Intrinsic Microporosity: From Structural Characteristics to Transport Behaviour

## Supplementary Information:

### Physical Property Analysis

#### Sorption Analysis

The process of gas molecule sorption in a membrane can be divided into the three following steps: (1) the molecule is absorbed in the membrane matrix, (2) the absorbate reacts or exchanges sorption sites in the membrane matrix, and (3) the absorbate desorbs from the membrane matrix. In the present work, MC simulations were used to correctly calculate and illustrate the three sorption mechanisms. Here, the sorption interface behaviours were simulated using the grand canonical Monte Carlo method (GCMC). In addition, the gas concentration probability in the membrane matrix was determined using the energy change between the new configuration and the previous configuration. In this procedure, the acceptance or rejection of the configurational movements of the sorbate molecules was decided using the Metropolis algorithm. There are four types of configurational movements, including creation, rotation, translation, and destruction. The creation and destruction probabilities of the movements of the sorbate molecules can be expressed as

$$P = \min \left[ 1; \exp \left( -\frac{\Delta E}{kT} \pm \ln \frac{(N_i + 1)kT}{f_i V} \right) \right], \quad (1)$$

where  $\Delta E$  is the energy change between the new configuration and the previous configuration,  $k$  is Boltzmann's constant,  $T$  is the assigned simulation temperature,  $N_i$  is the number of the component

$i$  molecule in the configuration,  $f$  is the fugacity of the component  $i$  molecule, and  $V$  is the cell volume. The probability of translational movement in the membrane cell is

$$P = \min\left[1; \exp\left(-\frac{\Delta E}{kT}\right)\right]. \quad (2)$$

All four types of the aforementioned probabilities were calculated and considered as a complete MC calculation step. The sorption analysis calculation in this work was processed 5,000,000 times. The number of accepted sorption configurations was recorded and calculated as the sorption loading.

## Torsional Angle Distributions

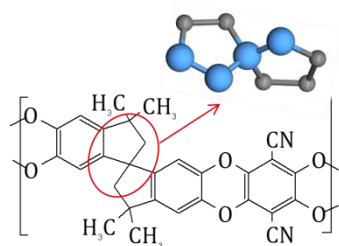

(a) PIM-1

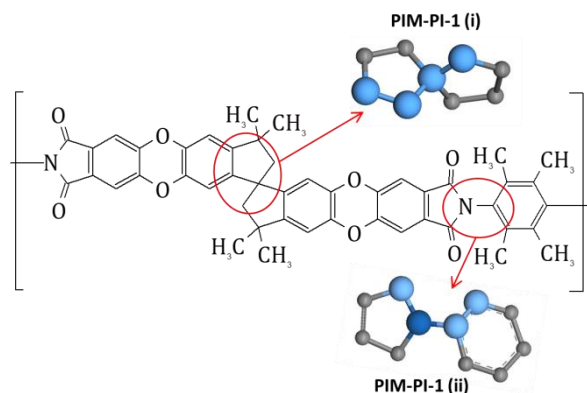

(b) PIM-PI-1

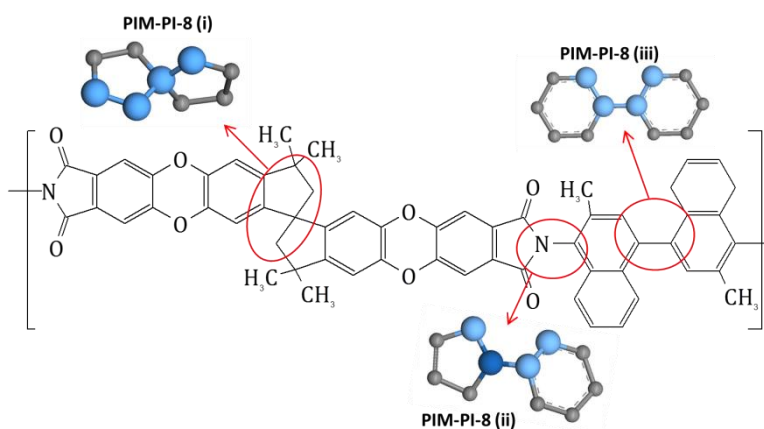

(c) PIM-PI-8

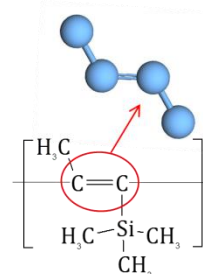

(d) PTMSP

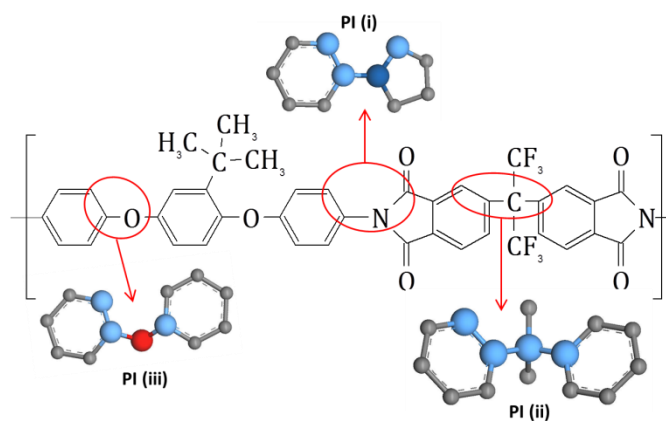

(e) PI

## Simulated and Experimental Values of Diffusivity and Permeability

### Diffusivity

**Table S1** Simulated and experimental diffusivities of four kinds of gas in the membranes.

|                       | Simulated diffusivity ( $10^{-8} \cdot \text{cm}^2 / \text{s}$ )    |                 |                 |                  |
|-----------------------|---------------------------------------------------------------------|-----------------|-----------------|------------------|
|                       | CO <sub>2</sub>                                                     | CH <sub>4</sub> | O <sub>2</sub>  | N <sub>2</sub>   |
| PIM-1                 | 75.28±5.34                                                          | 64.30±28.46     | 213.16±52.80    | 123.87±28.56     |
| PIM-PI-1              | 27.46±11                                                            | 19.97±8.40      | 72.56±28.56     | 39.19±16.77      |
| PIM-PI-8              | 71.96±39.22                                                         | 24.07±13.81     | 101.95±31.44    | 53.43±16.38      |
| PTMSP                 | 5739.74±433.84                                                      | 8782.01±1333.11 | 10323.80±876.47 | 10486.07±3764.44 |
| PI                    | 17.07±3.54                                                          | 8.57±3.13       | 29.88±12.66     | 7.90±3.05        |
|                       | Experimental diffusivity ( $10^{-8} \cdot \text{cm}^2 / \text{s}$ ) |                 |                 |                  |
|                       | CO <sub>2</sub>                                                     | CH <sub>4</sub> | O <sub>2</sub>  | N <sub>2</sub>   |
| PIM-1 <sup>1</sup>    | 160                                                                 | 71              | 390             | 160              |
| PIM-PI-1 <sup>2</sup> | 17                                                                  | 7               | 56              | 20               |
| PIM-PI-8 <sup>2</sup> | 45                                                                  | 14              | 130             | 41               |
| PTMSP <sup>3</sup>    | 2640                                                                | 2640            | 4650            | 3500             |
| PI                    | -                                                                   | -               | -               | -                |

## Permeability

**Table S2** Simulated and experimental permeabilities of four kinds of gas in the membranes.

|          | Simulated permeability (Barrer) |                 |                |                |
|----------|---------------------------------|-----------------|----------------|----------------|
|          | CO <sub>2</sub>                 | CH <sub>4</sub> | O <sub>2</sub> | N <sub>2</sub> |
| PIM-1    | 3199.19                         | 546.58          | 1172.40        | 396.37         |
| PIM-PI-1 | 950.10                          | 197.72          | 377.29         | 137.16         |
| PIM-PI-8 | 1480.93                         | 257.54          | 560.72         | 213.74         |
| PTMSP    | 51083.71                        | 50935.67        | 30971.40       | 25166.56       |
| PI       | 288.4374                        | 41.99           | 86.66          | 14.23          |

  

|                       | Experimental permeability (Barrer) |                 |                |                |
|-----------------------|------------------------------------|-----------------|----------------|----------------|
|                       | CO <sub>2</sub>                    | CH <sub>4</sub> | O <sub>2</sub> | N <sub>2</sub> |
| PIM-1 <sup>1</sup>    | 11200                              | 1160            | 1530           | 610            |
| PIM-PI-1 <sup>2</sup> | 1100                               | 77              | 150            | 47             |
| PIM-PI-8 <sup>2</sup> | 3700                               | 260             | 545            | 160            |
| PTMSP <sup>3</sup>    | 27984                              | 12936           | 7905           | 4900           |
| PI <sup>4</sup>       | -                                  | -               | 7.70           | 2.56           |

## Results with Error Bars

### The Dihedral Angle Distribution

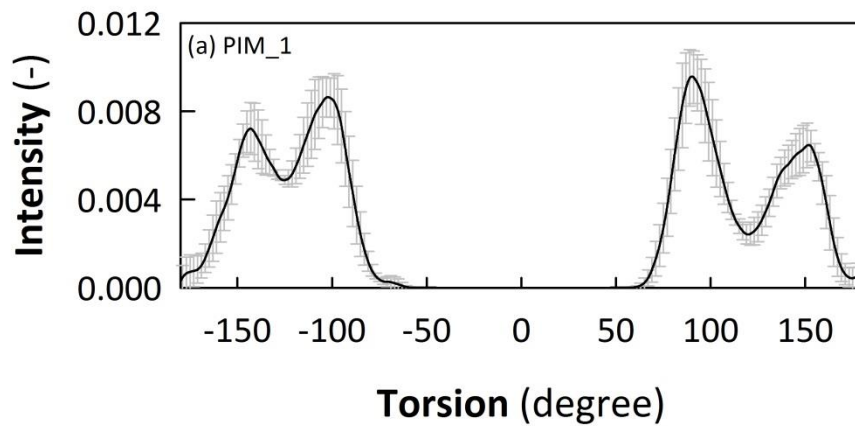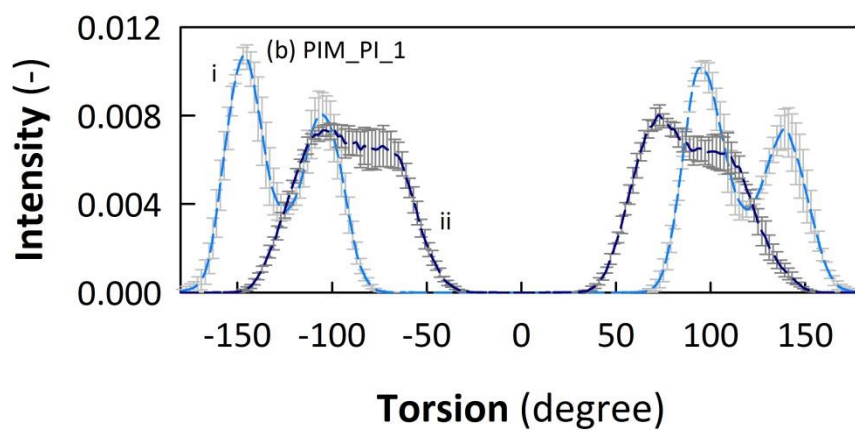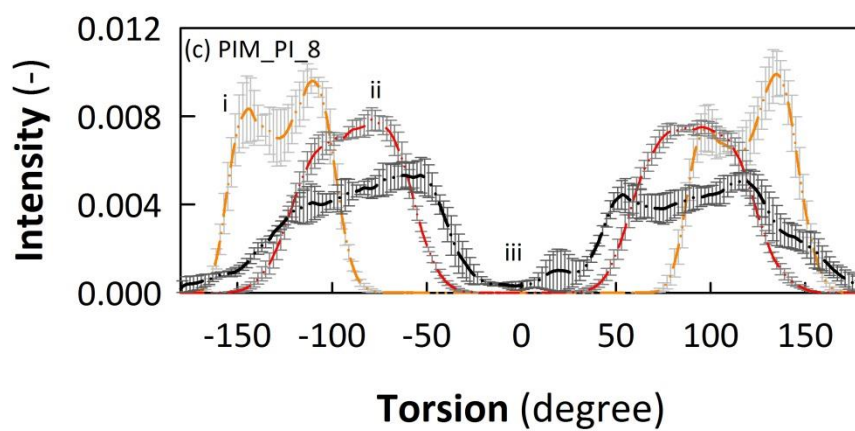

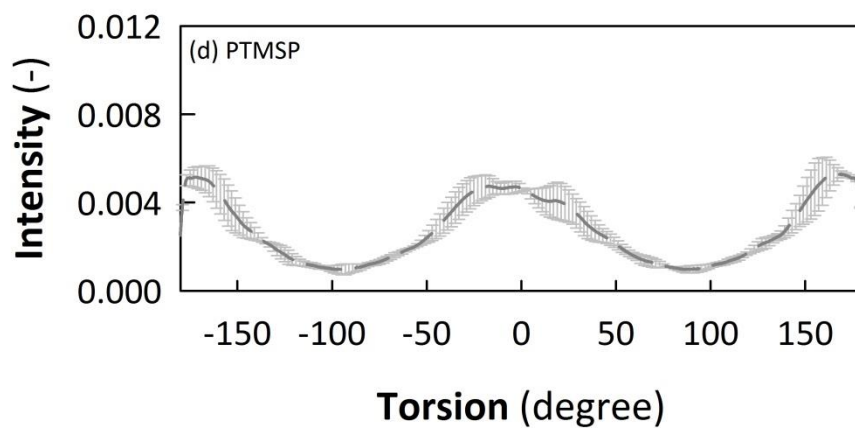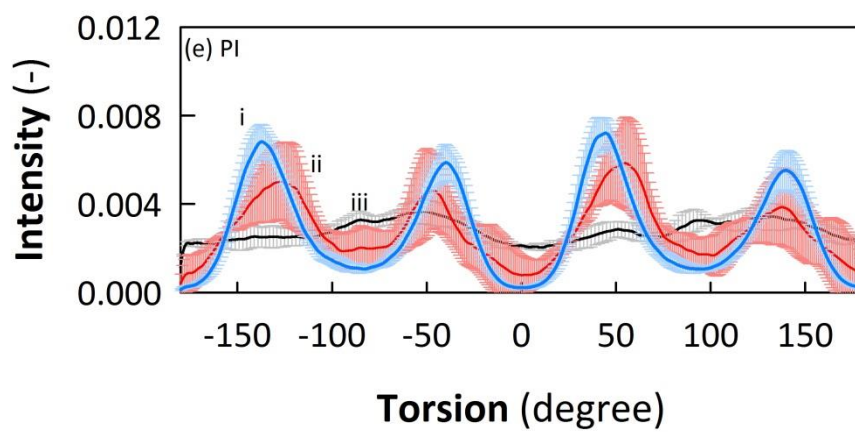

## Simulated WAXD diagrams

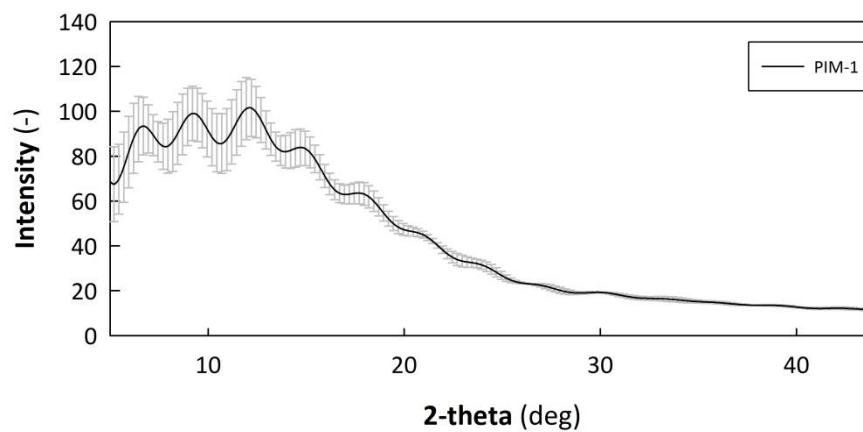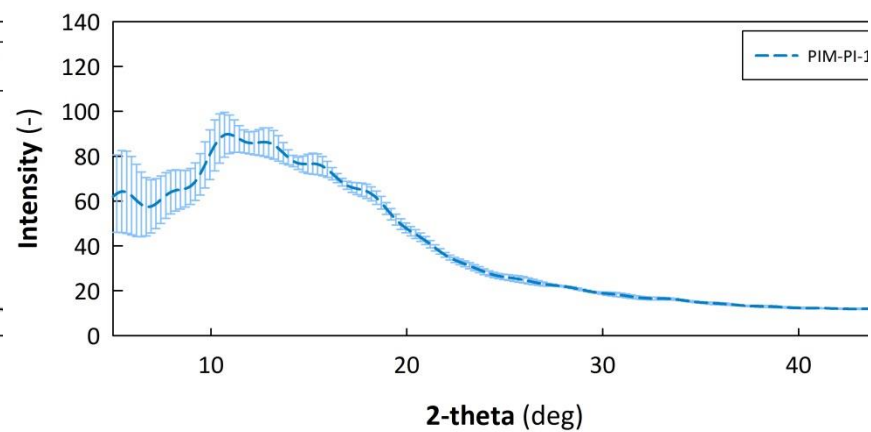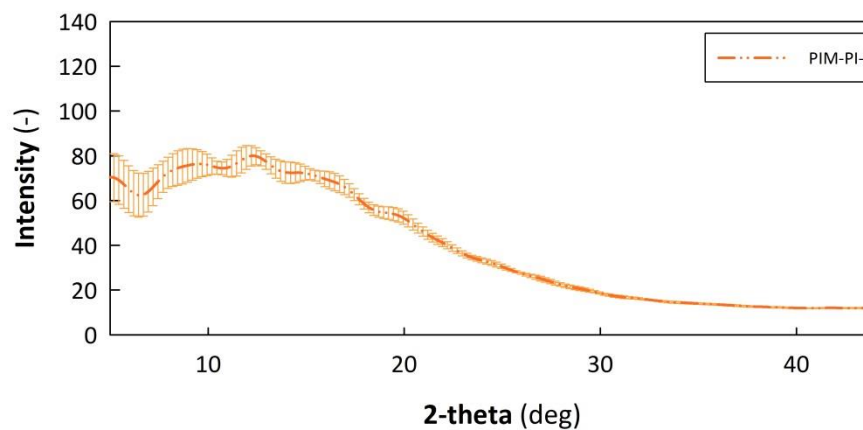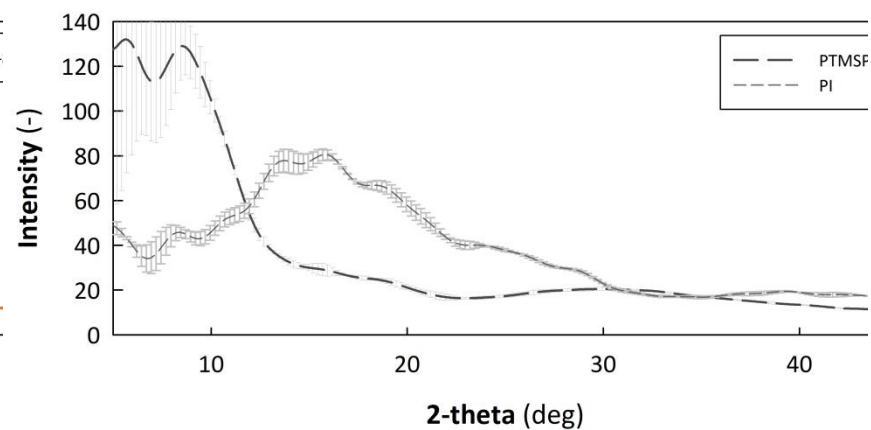



## FFV and FAV

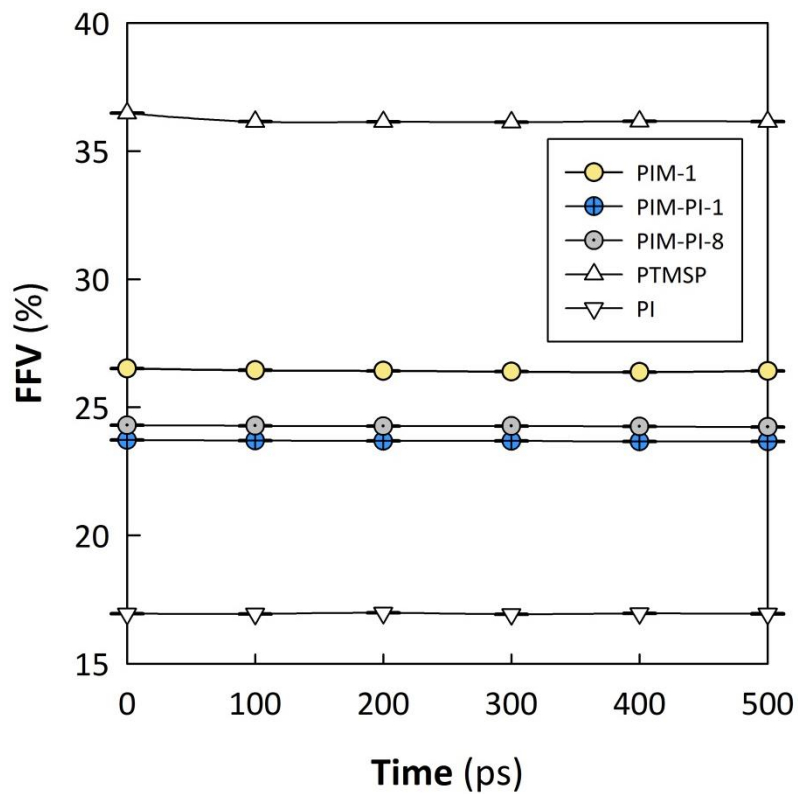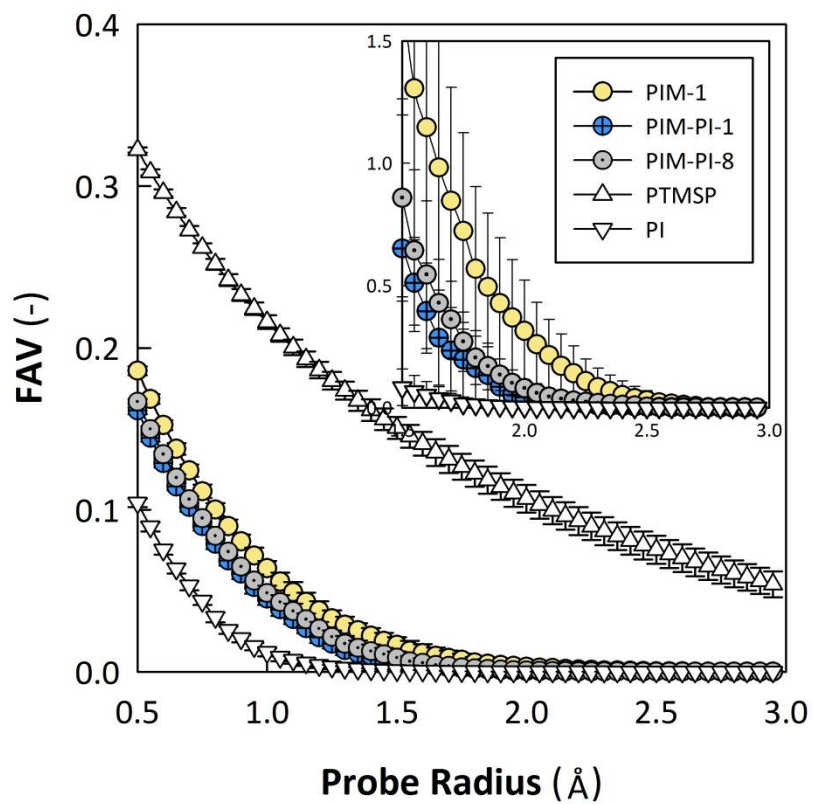

### Cavity size distributions

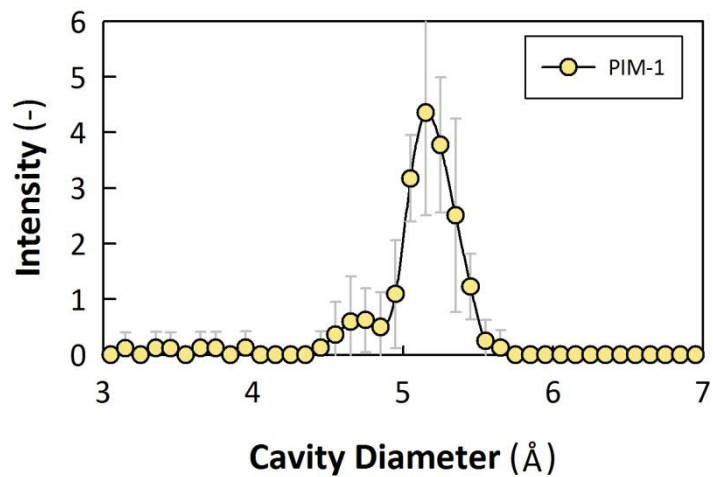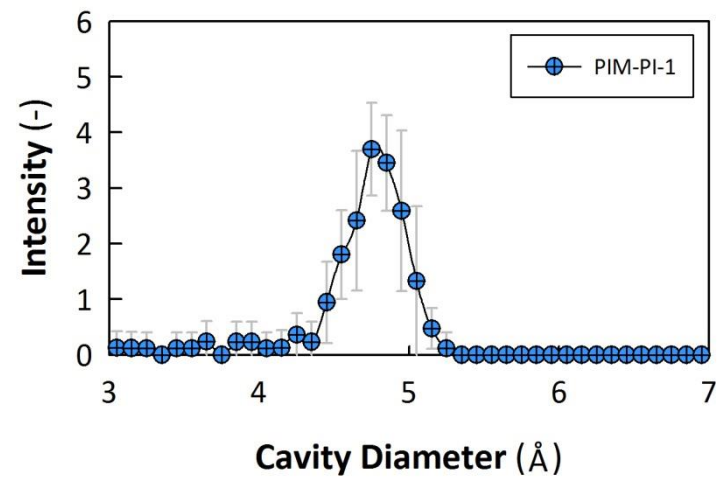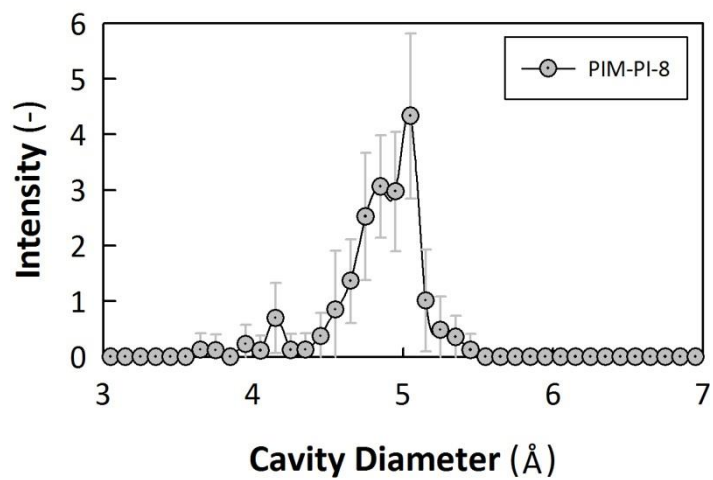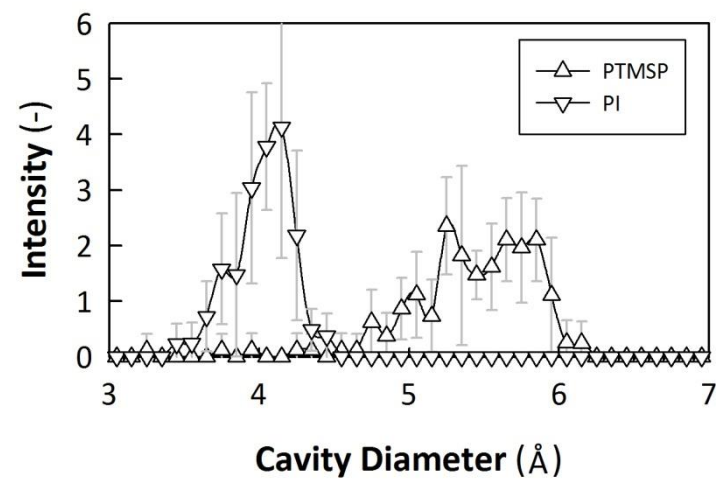



## MSD diagrams

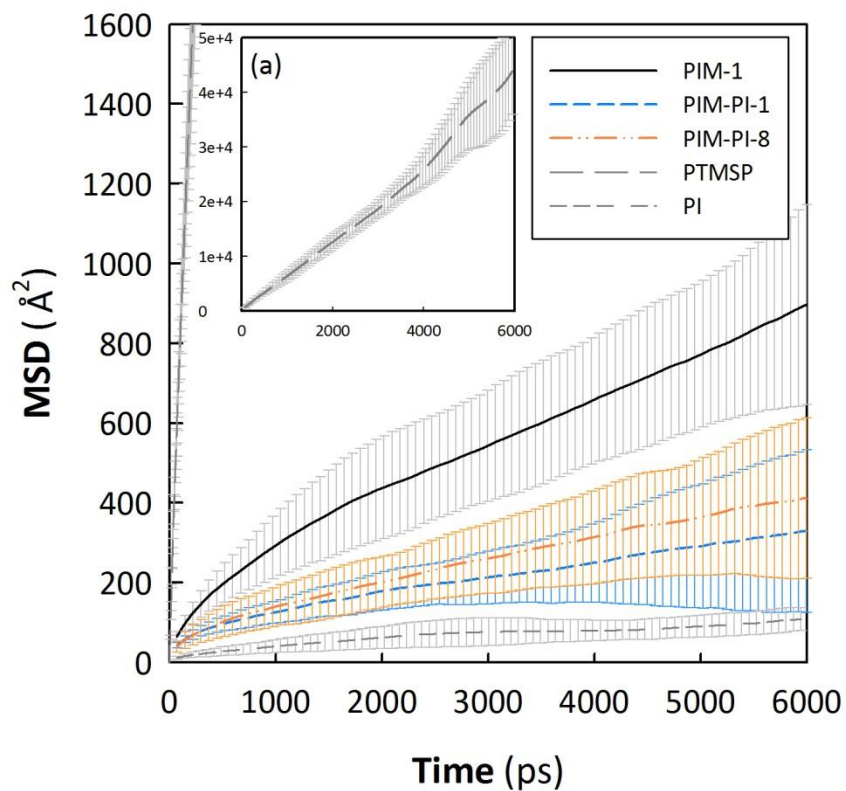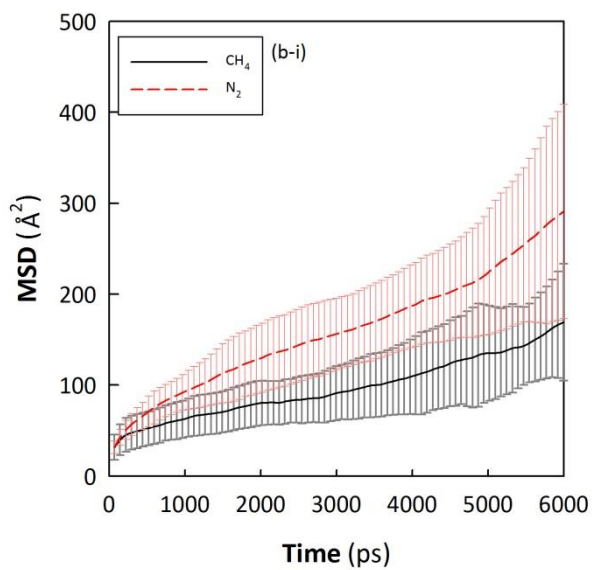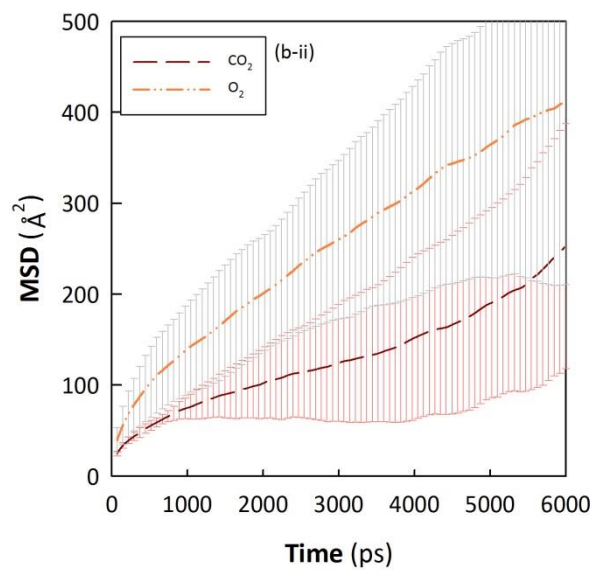

## References

1. P. M. Budd, N. B. McKeown, B. S. Ghanem, K. J. Msayib, D. Fritsch, L. Starannikova, N. Belov, O. Sanfirova, Y. Yampolskii and V. Shantarovich, *J. Membr. Sci.*, 2008, **325**, 851-860.
2. B. S. Ghanem, N. B. McKeown, P. M. Budd, J. D. Selbie and D. Fritsch, *Adv. Mater.*, 2008, **20**, 2766-2771.
3. D. Hofmann, M. Heuchel, Y. Yampolskii, V. Khotimskii and V. Shantarovich, *Macromolecules*, 2002, **35**, 2129-2140.
4. Y.-C. Wang, S.-H. Huang, C.-C. Hu, C.-L. Li, K.-R. Lee, D.-J. Liaw and J.-Y. Lai, *J. Membr. Sci.*, 2005, **248**, 15-25.
